# Supplementary material for: Organic Acids Improve Growth Performance with Potential Regulation of Redox Homeostasis, Immunity, and Microflora in Intestines of Weaned Piglets
Source: MDPI journal article supplement (doi:10.3390/antiox10111665), 2021-10-22
Supplement: s1 [file s1]

**Table S1.** Basal diet composition and nutrient level

| <b>Ingredients</b>                  | <b>Phase 1<br/>(Weanling-14<br/>days post<br/>weanling)</b> | <b>Phase 2<br/>(15-28 days post<br/>weanling)</b> | <b>Phase 3<br/>(29-49 days post<br/>weanling)</b> |
|-------------------------------------|-------------------------------------------------------------|---------------------------------------------------|---------------------------------------------------|
| CORN                                | 44.20                                                       | 55.31                                             | 62.57                                             |
| SBM46%                              | 10.14                                                       | 15.50                                             | 18.91                                             |
| Wheat flour                         | 5.00                                                        | 8.00                                              | 8.00                                              |
| Fishmeal                            | 3.00                                                        | -                                                 | -                                                 |
| Brewer's yeast distillers (60%CP)   | 2.00                                                        | -                                                 | -                                                 |
| Whey powder                         | 20.00                                                       | 5.00                                              | -                                                 |
| Extruded soybean                    | 6.00                                                        | 5.00                                              | 5.00                                              |
| Fermented soybean meal              | 4.00                                                        | 4.00                                              | -                                                 |
| Sucrose                             | 2.00                                                        | 2.00                                              | -                                                 |
| Soybean oil                         | 0.89                                                        | 1.04                                              | 1.34                                              |
| Dicalcium phosphate III (21%)       | 0.43                                                        | 0.93                                              | 0.98                                              |
| Limestone                           | 0.40                                                        | 0.85                                              | 0.94                                              |
| L-lysine hydrochloride (98.5%)      | 0.51                                                        | 0.61                                              | 0.55                                              |
| NaCl                                | 0.02                                                        | 0.33                                              | 0.41                                              |
| Mineral premix <sup>1</sup>         | 0.30                                                        | 0.30                                              | 0.30                                              |
| Vitamin premix <sup>2</sup>         | 0.30                                                        | 0.30                                              | 0.30                                              |
| L-Tryptophan (25%)                  | 0.30                                                        | 0.29                                              | 0.24                                              |
| DL-methionine (98.5%)               | 0.29                                                        | 0.27                                              | 0.22                                              |
| L-Threonine (98.5%)                 | 0.16                                                        | 0.21                                              | 0.18                                              |
| Choline chloride (60%)              | 0.05                                                        | 0.05                                              | 0.05                                              |
| Phytase (heat-stable, 20000 FTU/g)  | 0.01                                                        | 0.01                                              | 0.01                                              |
| <b>Total</b>                        | <b>100</b>                                                  | <b>100</b>                                        | <b>100</b>                                        |
| <b>Nutrients level <sup>3</sup></b> |                                                             |                                                   |                                                   |
| CP, %                               | 19.0                                                        | 18.0                                              | 17.5                                              |
| ME(Mcal/kg)                         | 3.41                                                        | 3.36                                              | 3.36                                              |
| CF, %                               | 1.82                                                        | 2.21                                              | 2.30                                              |
| ASH, %                              | 5.04                                                        | 4.80                                              | 4.57                                              |
| Ca, %                               | 0.60                                                        | 0.65                                              | 0.65                                              |
| TP, %                               | 0.58                                                        | 0.54                                              | 0.53                                              |
| aP(P) , %                           | 0.35                                                        | 0.29                                              | 0.27                                              |
| SID Lys, %                          | 1.35                                                        | 1.25                                              | 1.15                                              |
| SID Met, %                          | 0.57                                                        | 0.51                                              | 0.45                                              |
| SID Cys, %                          | 0.24                                                        | 0.24                                              | 0.24                                              |
| SID Met+Cys, %                      | 0.81                                                        | 0.75                                              | 0.69                                              |
| SID Thr , %                         | 0.81                                                        | 0.75                                              | 0.69                                              |
| SID Trp , %                         | 0.24                                                        | 0.23                                              | 0.21                                              |
| SID Arg, %                          | 0.94                                                        | 1.01                                              | 1.00                                              |
| SID Ile, %                          | 0.71                                                        | 0.63                                              | 0.59                                              |
| SID Val, %                          | 0.78                                                        | 0.70                                              | 0.68                                              |
| SID Leu, %                          | 1.36                                                        | 1.28                                              | 1.27                                              |
| Phytase (FTU/KG)                    | 1000                                                        | 1000                                              | 1000                                              |

<sup>1</sup> Provided the following per kg of diets: Fe, 100 mg; Cu, 20 mg; Mn, 25 mg; Zn, 100 mg; Na<sub>2</sub>O<sub>3</sub>, 0.3 mg; I, 0.3 mg.

<sup>2</sup> Provided the following per kg of diets: retinyl acetate, 10000 IU; cholecalciferol 2500 IU; dl- $\alpha$ -tocopheryl acetate, 50 IU; menadione, 5.0 mg; thiamin, 2.0 mg; riboflavin, 5.0 mg; pantothenic acid, 12.0 mg; pyridoxine, 10.0 mg; niacin, 30.0 mg; d-biotin, 0.2 mg; folic acid, 1.5 mg; cyanocobalamin, 0.05 mg; choline chloride 1500 mg.

<sup>3</sup> Nutrient Levels were a calculated value.

**Table S2.** List of primers used for Q-PCR analysis<sup>1</sup>

| Gene                          | Gene accession number | Forward primer (5' to 3') | Reverse primer (5' to 3') |
|-------------------------------|-----------------------|---------------------------|---------------------------|
| <i>IL-1<math>\beta</math></i> | NM_214055.1           | GCCCAATTCAGGGACCCTAC      | GGCGGGTTCAGGTACTATGG      |
| <i>IL-2</i>                   | NM_213861.1           | CCCTTGCACTCATGGCAAAC      | TAGCACTCCCTCCAGAGCTT      |
| <i>IL-6</i>                   | NM_001252429.1        | GCAGTCACAGAACGAGTGGA      | CTCAGGCTGAACTGCAGGAA      |
| <i>MLCK</i>                   | XM_001929078.6        | ATGGCAATCGGGAGCATGAG      | TCCTCCCCGTCTTCTGTTCT      |
| <i>PBD1</i>                   | NM_214442.2           | CCAGCTGGCTGCAGGTATTA      | ACTTGGCCTTGCCACTGTAA      |
| <i>PBD2</i>                   | NM_213738.1           | AACCTGCTTACGGGTCTTGG      | TGCCACTGTAAACAGGTCCC      |
| <i>PEP2C</i>                  | BK005522.1            | ACCAAGGGTCCCAGAGAACT      | GGCTCTGGAGAACAAGCAGT      |
| <i>NPG1</i>                   | NM_001123149.1        | TGACTTCAAGGAGAACGGGC      | GGAACCTTGGTGGACCGAAT      |
| <i>NPG3</i>                   | NM_001123150.1        | TGACTTCAAGGAGAACGGGC      | ACAATAGCACAGGCCACCTC      |
| <i>PR39</i>                   | NM_214450.1           | TGACTTCAAGGAGAACGGGC      | CAAATATGGGGGTCTGGGGAC     |
| <i>Claudin-1</i>              | NM_001244539.1        | GCCACTGTTGGCATGAAGTG      | CTGGCATTGACTGGGGTCAT      |
| <i>Claudin-2</i>              | NM_001161638.1        | ATCCTCTGCTTTTCCTGCCC      | CTGTCCACTGGCTCTCACAG      |
| <i>Occludin</i>               | NM_001163647.2        | CAGGTGCACCCTCCAGATTG      | ATGTCGTTGCTGGGTGCATA      |
| <i>ZO-1</i>                   | XM_021098896.1        | GCCAGCTGGAGCTTAGAACA      | GGCATCAAGAGGGGCTACTG      |
| <i>GAPDH</i>                  | NM_001206359.1        | GGTCGGAGTGAACGGATTT       | ATTTGATGTTGGCGGGAT        |

<sup>1</sup>(*IL*)-1 $\beta$ , -2 and -6, *Interleukin* -1 $\beta$ , -2 and -6; *MLCK*, *myosin light chain kinase*; *PBD1* and 2, *Porcine  $\beta$ -Defensin* 1 and 2; *PEP2C*, *epididymis protein 2 splicing variant C*, *NPG1* and 3, *protegrin* 1 and 3; *PR39*, *proline/arginine-rich peptide of 39 amino acids*; *ZO-1*, *zonula occludens-1*; *GAPDH*, *glyceraldehyde-3-phosphate dehydrogenase*.
